# Supplementary material
Source: PubMed Central journal article supplement (PMC4063187)
Supplement: ja501936d_si_001.pdf [file ja501936d_si_001.pdf]

## Supplementary Information

### Protein Mass-modulated Effects in the Catalytic Mechanism of Dihydrofolate

#### Reductase: Beyond Promoting Vibrations

Zhen Wang,<sup>1</sup> Priyanka Singh,<sup>2</sup> Clarissa M. Czekster,<sup>1,§</sup> Amnon Kohen,<sup>2,\*</sup> and Vern L. Schramm<sup>1,\*</sup>

<sup>1</sup> Department of Biochemistry, Albert Einstein College of Medicine, Bronx, NY 10461

<sup>2</sup> Department of Chemistry, University of Iowa, Iowa City, IA 52242

\* Author to whom correspondences should be addressed.

E-mail: vern.schramm@einstein.yu.edu Phone: 718-430-2814

E-mail: amnon-kohen@uiowa.edu Phone: 319-335-0234

§ This author's present address: Department of Chemistry, Yale University, 350 Edwards Street, New Haven, CT 06511.

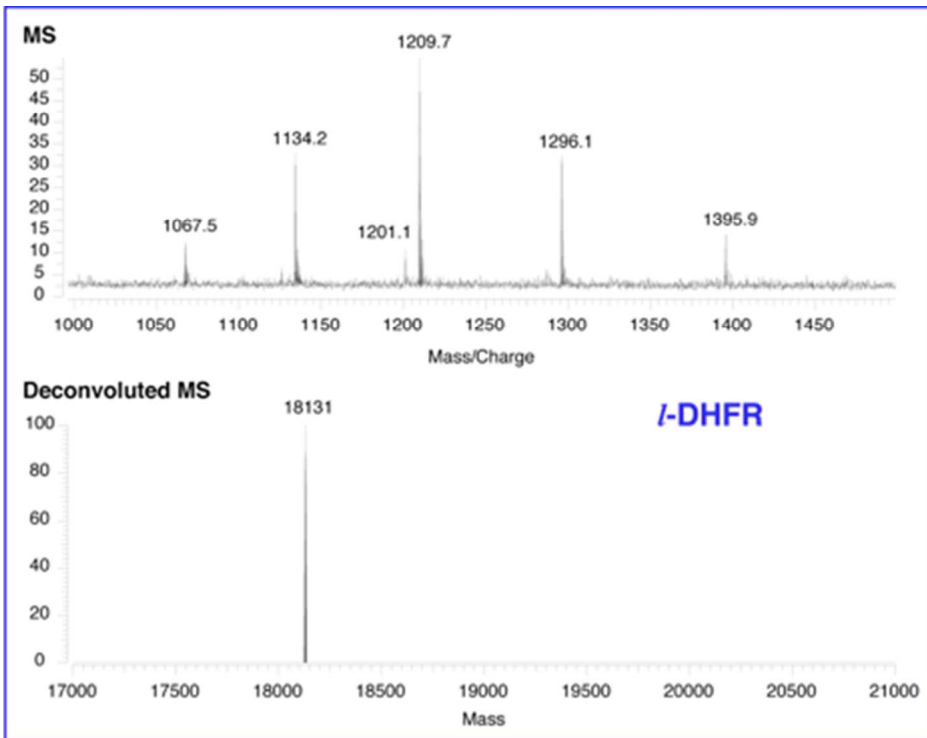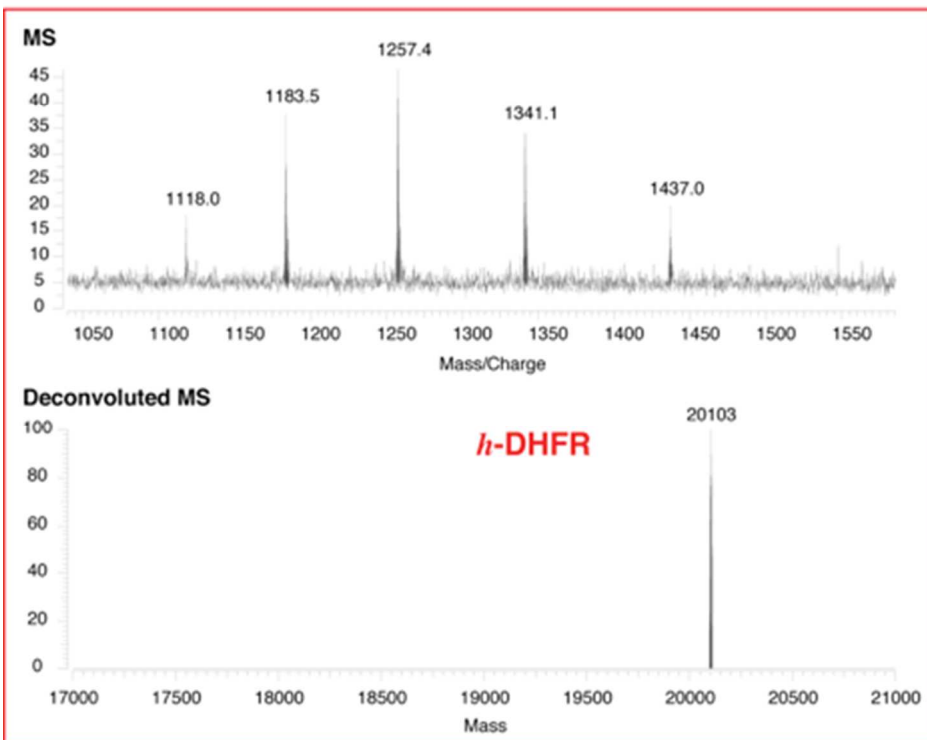

Figure S1. The raw (x-axis: Mass/Charge) and deconvoluted (x-axis: Mass) mass spectra of light ecDHFR (*l*-DHFR) and heavy ecDHFR (*h*-DHFR). The *h*-DHFR is 11% heavier than *l*-DHFR.

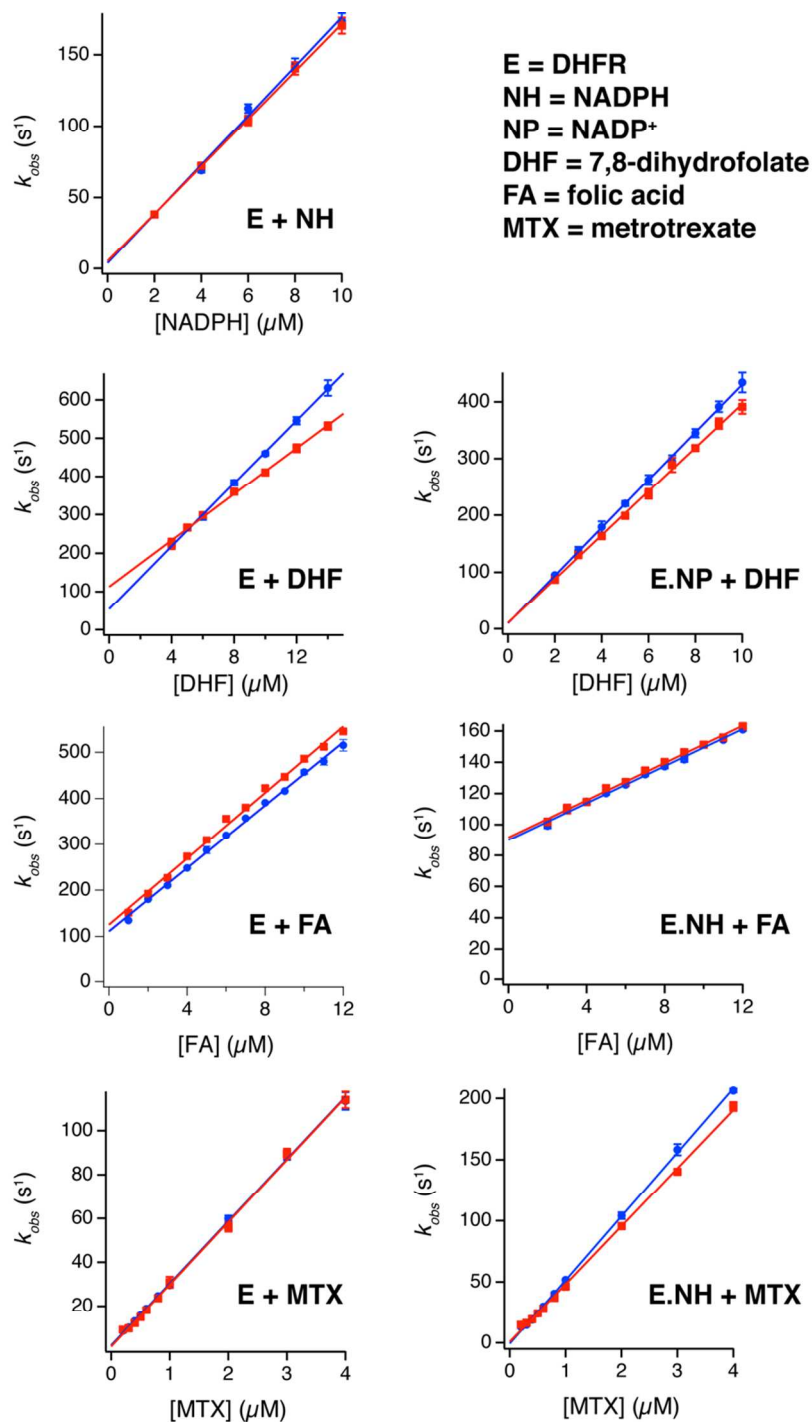

**Figure S2.** The observed rate constants ( $k_{obs}$ ) of the ligand-dependent exponential phase in formation of binary and ternary complexes of *l*-DHFR (blue) and *h*-DHFR (red) with various ligands (L), measured at 25 °C, pH 7. The association and dissociation rate constants ( $k_{on}$  and  $k_{off}$ , respectively) of each ligand can be solved from:  $k_{obs} = k_{on} \cdot [L] + k_{off}$ .<sup>1</sup> The values of  $k_{on}$  and  $k_{off}$  are summarized in Table 4 in the main text.

Table S1. The observed H/T and D/T KIEs on  $k_{cat}/K_M^{NADPH}$  ( $^T(V/K)$  and  $^T(V/K)_D$ , respectively), intrinsic H/T and H/D KIEs on the hydride transfer ( $^T k_{hyd}$  and  $^D k_{hyd}$ , respectively), and forward commitment factor ( $C_f$ ) of *l*-DHFR (numbers in blue) and *h*-DHFR (numbers in red) determined by the competitive KIE experiments at pH 9 (Figure 4 in main text).

| Temperature (°C) | $^T(V/K)$   | $^T(V/K)_D$ | $^T k_{hyd}$ | $^D k_{hyd}$ | $C_f$       |
|------------------|-------------|-------------|--------------|--------------|-------------|
| 5                | 3.1 ± 0.1   | 1.51 ± 0.02 | 6.2 ± 0.4    | 3.5 ± 0.2    | 1.5 ± 0.2   |
|                  | 2.40 ± 0.05 | 1.50 ± 0.02 | 11.7 ± 0.5   | 5.6 ± 0.2    | 6.6 ± 0.4   |
| 10               | 3.69 ± 0.03 | 1.57 ± 0.03 | 5.9 ± 0.5    | 3.7 ± 0.2    | 0.8 ± 0.2   |
| 15               | 4.76 ± 0.04 | 1.63 ± 0.01 | 5.9 ± 0.3    | 3.5 ± 0.1    | 0.30 ± 0.08 |
|                  | 3.29 ± 0.04 | 1.61 ± 0.05 | 9.2 ± 0.7    | 4.7 ± 0.3    | 2.6 ± 0.3   |
| 25               | 4.85 ± 0.09 | 1.66 ± 0.03 | 6.1 ± 0.4    | 3.6 ± 0.2    | 0.3 ± 0.1   |
|                  | 4.10 ± 0.03 | 1.64 ± 0.04 | 6.9 ± 0.1    | 3.88 ± 0.05  | 0.91 ± 0.03 |
| 35               | 4.8 ± 0.1   | 1.66 ± 0.01 | 6.3 ± 0.4    | 3.6 ± 0.2    | 0.4 ± 0.1   |
|                  | 4.91 ± 0.04 | 1.69 ± 0.02 | 6.9 ± 0.2    | 3.9 ± 0.1    | 0.52 ± 0.04 |
| 45               | 4.8 ± 0.1   | 1.65 ± 0.02 | 6.1 ± 0.4    | 3.6 ± 0.2    | 0.3 ± 0.1   |
|                  | 5.05 ± 0.06 | 1.70 ± 0.07 | 6.9 ± 0.4    | 3.88 ± 0.03  | 0.5 ± 0.1   |

(1) Fierke, C. A.; Johnson, K. A.; Benkovic, S. J. *Biochemistry* **1987**, *26*, 4085-4092.
